# Supplementary material
Source: PubMed Central journal article supplement (PMC534721)
Supplement: pnas_101_48_16721__5.pdf [file pnas_101_48_16721__5.pdf]

1BHSD1 1 M A F M K K Y L L P I L G L F M A Y Y Y S A N E E F R P E M L Q Q K K V I V T G A S K K G I G R E M A Y 50  
 1iy8 . . . . . T A T S S P T T R F T D R V V L I T G G G S G L G R A T A Y

1BHSD1 60 H L A K M G A H V V V T A R S K E T L Q K V V S H C L E L G . A A S A H Y I A G T M E D M T F A E Q F V 100  
 1iy8 R L A A E G A K L S L V D V S S E G L E A S K A A V L E T A X D A E V L T T V A D V S D E A Q V E A Y V

1BHSD1 110 A Q A G K L M G G L D M L I L N H I T N . T S L N L F H D D I H H V R K S M E V N F L S Y V V L T V A A 150  
 1iy8 T A T T E R F G R I D G F F N N A G I E X K Q N P T E S F T A A E F D K V V S I N L R G V F L G L E K V

1BHSD1 160 L P M L . K Q S N G S I V V V S S L A G K V A Y P M V A A Y S A S K K F A L D G F F S S I R K E Y S V S R 200  
 1iy8 L K I M X E Q G S G M V V N T A S V G G I R G I G N Q S G Y A A A K H G V V G L T R N S A V E Y G R Y G

1BHSD1 210 V N V S I T L C V L G L I D T E T A M K A V S G I V H M Q A A P . K E E C A L E I I K G G A L R Q E E V 260  
 1iy8 I R I N . . A I A P G A I W T P M V E N S M K Q L D P E N P R K X A E E F I Q V N P S K R Y G E A P E .

1BHSD1 270 Y Y D S S L W T T L L I R N P C R K I L E F L Y S T S Y N M D R F I N K 290  
 1iy8 I A A V V A F L L S . . . . . D D A S Y V N A T V V P I D G G Q S .
