# Supplementary material
Source: PubMed Central journal article supplement (PMC534721)
Supplement: pnas_101_48_16721__6.pdf [file pnas_101_48_16721__6.pdf]

11BHSD2\_71\_405 1 R L A R P Q R L P V A T R A V L I T G C D S G F G K E T A K K L D S M G F T V L A T V L E L N . . S P G  
 1gco . M . . . . Y K D L E G K V V V I T G S S T G L G K S M A I R F A T E K A K V V V N Y R S K E D E A N S

11BHSD2\_71\_405 60 A I E L R T C C S P R L R L L Q M D L T K P G D I S R V L E F T K A H T T S T G L W G L V N N A G H N E  
 1gco V L E E I K K V G G E A I A V K G D V T V E S D V I N L V Q S A I K E F G K . . L D V M I N N A G L E N

11BHSD2\_71\_405 110 V V A D A E L S P V A T F R S C M E V N F F G A L E L T K G L L P L L R S S . . R G R I V T V G S P A G  
 1gco P V . S S H E M S L S D W N K V I D T N L T G A F L G S R E A I K Y F V E N D I K G T V I N M S S V H E

11BHSD2\_71\_405 160 D M P Y P C L G A Y G T S K A A V A L L M D T F S C E L L P W G V K V S I I Q P G C F K T E S V R N V G  
 1gco K I P W P L F V H Y A A S K G G M K L M T E I L A L E Y A P K G I R V N N I G P G A I N T P I N A E K F

11BHSD2\_71\_405 210 Q W E K R K Q L L L A N L P Q E L L Q A Y G K D Y I E H L H G Q F L H S L R L A M S D L T P V V D A I T  
 1gco A D P E Q R A D V E S M I P M G Y I G E P . . E E I A A V A A W L A S S E A S Y V T G I T L F A D G G M

11BHSD2\_71\_405 270 D A L L A A R P R R R Y Y P G Q G L G L M Y F I H Y Y L P E G L R R R F L Q A F F I S H C L P R A L Q P  
 1gco T . . . . . Q Y P S F Q A G R G . . . . .

11BHSD2\_71\_405 320 G Q P G T T P P Q D A A Q D P N L S P G P S P A V A R  
 1gco . . . . .
