# Supplementary material
Source: PubMed Central journal article supplement (PMC534721)
Supplement: pnas_101_48_16721__7.pdf [file pnas_101_48_16721__7.pdf]

**Table 2. Synopsis of inhibition data**

| Entry | Structure                                                                                                             | Cdc25A<br>IC <sub>50</sub> /IC <sub>50</sub><br>in 0.001%<br>T* | AChE<br>IC <sub>50</sub> /IC <sub>50</sub><br>in 0.01%<br>T* | 11βHSD1<br>IC <sub>50</sub> /IC <sub>50</sub><br>in 0.01%<br>T* | 11βHS<br>D2<br>IC <sub>50</sub> ,<br>μM |
|-------|-----------------------------------------------------------------------------------------------------------------------|-----------------------------------------------------------------|--------------------------------------------------------------|-----------------------------------------------------------------|-----------------------------------------|
| 1     | 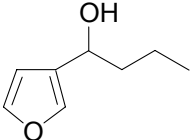 <chem>CCCC(O)c1ccoc1</chem>         | >100                                                            | >20                                                          | >20                                                             | >20                                     |
| 2     |  <chem>CCCCCCC(O)c1ccoc1</chem>      | >100                                                            | >20                                                          | >20                                                             | >20                                     |
| 3     |  <chem>CCCCCCCC(O)c1ccoc1</chem>    | >100                                                            | >20                                                          | >20                                                             | >20                                     |
| 4     |  <chem>CCCCCCCCCO(O)c1ccoc1</chem> | >100                                                            | >20                                                          | >20                                                             | >20                                     |

| Entry | Structure                                                                           | Cdc25A<br>IC <sub>50</sub> /IC <sub>50</sub><br>in 0.001%<br>T* | AChE<br>IC <sub>50</sub> /IC <sub>50</sub><br>in 0.01%<br>T* | 11βHSD1<br>IC <sub>50</sub> /IC <sub>50</sub><br>in 0.01%<br>T* | 11βHS<br>D2<br>IC <sub>50</sub> ,<br>μM |
|-------|-------------------------------------------------------------------------------------|-----------------------------------------------------------------|--------------------------------------------------------------|-----------------------------------------------------------------|-----------------------------------------|
| 5     | 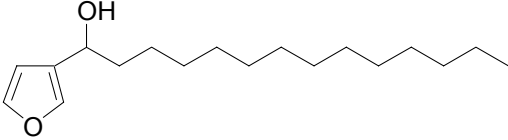   | >100                                                            | >20                                                          | >20                                                             | >20                                     |
| 6     |    | >100                                                            | >20                                                          | >20                                                             | >20                                     |
| 7     |    | >100                                                            | >20                                                          | >20                                                             | >20                                     |
| 8     |   | >100                                                            | >20                                                          | >20                                                             | >20                                     |
| 9     |  | 26                                                              | >20                                                          | >20                                                             | >20                                     |

| Entry | Structure                                                                           | Cdc25A<br>IC <sub>50</sub> /IC <sub>50</sub><br>in 0.001%<br>T* | AChE<br>IC <sub>50</sub> /IC <sub>50</sub><br>in 0.01%<br>T* | 11βHSD1<br>IC <sub>50</sub> /IC <sub>50</sub><br>in 0.01%<br>T* | 11βHS<br>D2<br>IC <sub>50</sub> ,<br>μM |
|-------|-------------------------------------------------------------------------------------|-----------------------------------------------------------------|--------------------------------------------------------------|-----------------------------------------------------------------|-----------------------------------------|
| 10    | 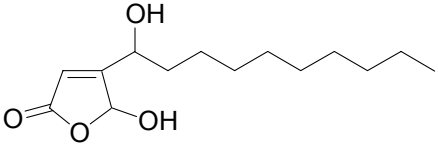   | 8.4                                                             | >20                                                          | >20                                                             | >20                                     |
| 11    |    | 2.3                                                             | >20                                                          | 20.4 ± 1.5                                                      | 16.7 ± 0.4                              |
| 12    |    | 6.4 ± 2.4                                                       | >20                                                          | 45 ± 15                                                         | 10.2 ± 0.2                              |
| 13    |   | 7                                                               | >20                                                          | >20                                                             | >20                                     |
| 14    |  | 2                                                               | >20                                                          | >20                                                             | >20                                     |

| Entry | Structure                                                                           | Cdc25A<br>IC <sub>50</sub> /IC <sub>50</sub><br>in 0.001%<br>T* | AChE<br>IC <sub>50</sub> /IC <sub>50</sub><br>in 0.01%<br>T* | 11βHSD1<br>IC <sub>50</sub> /IC <sub>50</sub><br>in 0.01%<br>T* | 11βHS<br>D2<br>IC <sub>50</sub> ,<br>μM |
|-------|-------------------------------------------------------------------------------------|-----------------------------------------------------------------|--------------------------------------------------------------|-----------------------------------------------------------------|-----------------------------------------|
| 15    | 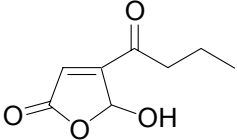   | >100                                                            | >20                                                          | >20                                                             | >20                                     |
| 16    |    | >100                                                            | >20                                                          | >20                                                             | >20                                     |
| 17    |    | 18                                                              | >20                                                          | >20                                                             | >20                                     |
| 18    |   | 5.9 ± 1.7                                                       | >20                                                          | 84 ± 12                                                         | 12.3 ± 1.0                              |
| 19    |  | 4.5                                                             | >20                                                          | >20                                                             | >20                                     |

| Entry | Structure                                                                           | Cdc25A<br>IC <sub>50</sub> /IC <sub>50</sub><br>in 0.001%<br>T* | AChE<br>IC <sub>50</sub> /IC <sub>50</sub><br>in 0.01%<br>T* | 11βHSD1<br>IC <sub>50</sub> /IC <sub>50</sub><br>in 0.01%<br>T* | 11βHS<br>D2<br>IC <sub>50</sub> ,<br>μM |
|-------|-------------------------------------------------------------------------------------|-----------------------------------------------------------------|--------------------------------------------------------------|-----------------------------------------------------------------|-----------------------------------------|
| 20    | 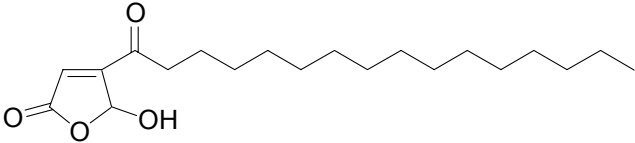   | >100                                                            | >20                                                          | >20                                                             | >20                                     |
| 21    |    | >100                                                            | >20                                                          | >20                                                             | >20                                     |
| 22    |   | >100                                                            | >20                                                          | >20                                                             | >20                                     |
| 23    |  | >100                                                            | >20                                                          | >20                                                             | >20                                     |

| Entry | Structure                                                                          | Cdc25A<br>IC <sub>50</sub> /IC <sub>50</sub><br>in 0.001%<br>T* | AChE<br>IC <sub>50</sub> /IC <sub>50</sub><br>in 0.01%<br>T* | 11βHSD1<br>IC <sub>50</sub> /IC <sub>50</sub><br>in 0.01%<br>T* | 11βHS<br>D2<br>IC <sub>50</sub> ,<br>μM |
|-------|------------------------------------------------------------------------------------|-----------------------------------------------------------------|--------------------------------------------------------------|-----------------------------------------------------------------|-----------------------------------------|
| 24    | 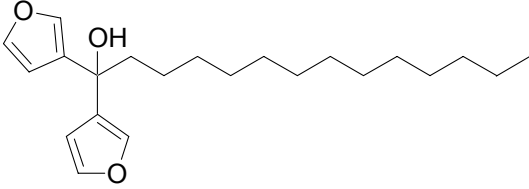  | >100                                                            | >20                                                          | >20                                                             | >20                                     |
| 25    |   | >100                                                            | >20                                                          | >20                                                             | >20                                     |
| 26    |  | >100                                                            | >20                                                          | >20                                                             | >20                                     |

| Entry | Structure                                                                           | Cdc25A<br>IC <sub>50</sub> /IC <sub>50</sub><br>in 0.001%<br>T* | AChE<br>IC <sub>50</sub> /IC <sub>50</sub><br>in 0.01%<br>T* | 11βHSD1<br>IC <sub>50</sub> /IC <sub>50</sub><br>in 0.01%<br>T* | 11βHS<br>D2<br>IC <sub>50</sub> ,<br>μM |
|-------|-------------------------------------------------------------------------------------|-----------------------------------------------------------------|--------------------------------------------------------------|-----------------------------------------------------------------|-----------------------------------------|
| 27    | 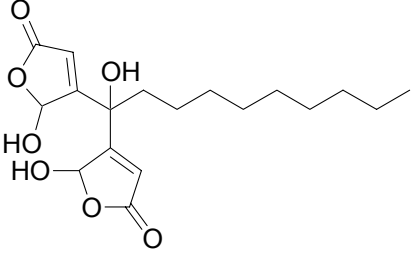   | 5.3                                                             | >20                                                          | >20                                                             | >20                                     |
| 28    |   | 3                                                               | >20                                                          | >20                                                             | >20                                     |
| 29    |  | 6                                                               | >20                                                          | >20                                                             | >20                                     |

| Entry | Structure                                                                           | Cdc25A<br>IC <sub>50</sub> /IC <sub>50</sub><br>in 0.001%<br>T* | AChE<br>IC <sub>50</sub> /IC <sub>50</sub><br>in 0.01%<br>T* | 11βHSD1<br>IC <sub>50</sub> /IC <sub>50</sub><br>in 0.01%<br>T* | 11βHS<br>D2<br>IC <sub>50</sub> ,<br>μM |
|-------|-------------------------------------------------------------------------------------|-----------------------------------------------------------------|--------------------------------------------------------------|-----------------------------------------------------------------|-----------------------------------------|
| 30    | 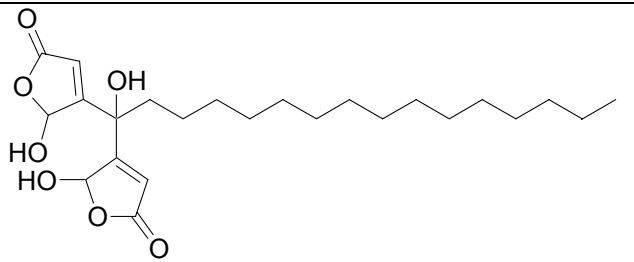   | 1.4 ± 0.5                                                       | >20                                                          | >20                                                             | >20                                     |
| 31    |   | 2                                                               | >20                                                          | >20                                                             | >20                                     |
| 32    |  | >100                                                            | >20                                                          | >20                                                             | >20                                     |
| 33    |  | >100                                                            | >20                                                          | >20                                                             | >20                                     |



| Entry | Structure                                                                           | Cdc25A<br>IC <sub>50</sub> /IC <sub>50</sub><br>in 0.001%<br>T* | AChE<br>IC <sub>50</sub> /IC <sub>50</sub><br>in 0.01%<br>T* | 11βHSD1<br>IC <sub>50</sub> /IC <sub>50</sub><br>in 0.01%<br>T* | 11βHS<br>D2<br>IC <sub>50</sub> ,<br>μM |
|-------|-------------------------------------------------------------------------------------|-----------------------------------------------------------------|--------------------------------------------------------------|-----------------------------------------------------------------|-----------------------------------------|
| 34    | 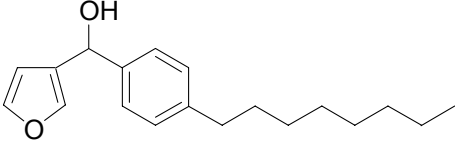   | >100                                                            | >20                                                          | >20                                                             | >20                                     |
| 35    |    | >100                                                            | >20                                                          | >20                                                             | >20                                     |
| 36    |   | >100                                                            | >20                                                          | >20                                                             | >20                                     |
| 37    |  | >100                                                            | >20                                                          | >20                                                             | >20                                     |

| Entry | Structure                                                                                                                                                                                                                                                                                                         | Cdc25A<br>IC <sub>50</sub> /IC <sub>50</sub><br>in 0.001%<br>T* | AChE<br>IC <sub>50</sub> /IC <sub>50</sub><br>in 0.01%<br>T* | 11βHSD1<br>IC <sub>50</sub> /IC <sub>50</sub><br>in 0.01%<br>T* | 11βHS<br>D2<br>IC <sub>50</sub> ,<br>μM |
|-------|-------------------------------------------------------------------------------------------------------------------------------------------------------------------------------------------------------------------------------------------------------------------------------------------------------------------|-----------------------------------------------------------------|--------------------------------------------------------------|-----------------------------------------------------------------|-----------------------------------------|
| 38    | 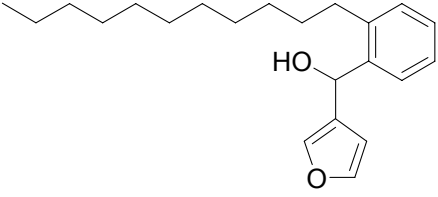 <p>Chemical structure of 1-(10-undecyloxyphenyl)ethan-1-ol-1-yl furan-2-ylmethanol. It features a furan ring connected to a chiral carbon atom, which is also bonded to a hydroxyl group and a 10-undecyloxyphenyl group.</p>   | >100                                                            | >20                                                          | >20                                                             | >20                                     |
| 39    |  <p>Chemical structure of 1-(10-undecyloxyphenyl)ethan-1-ol-1-yl furan-2-ylmethanol. It features a furan ring connected to a chiral carbon atom, which is also bonded to a hydroxyl group and a 10-undecyloxyphenyl group.</p>   | >100                                                            | >20                                                          | >20                                                             | >20                                     |
| 40    |  <p>Chemical structure of 1-(10-undecyloxyphenyl)ethan-1-ol-1-yl furan-2-ylmethanol. It features a furan ring connected to a chiral carbon atom, which is also bonded to a hydroxyl group and a 10-undecyloxyphenyl group.</p>  | >100                                                            | >20                                                          | >20                                                             | >20                                     |
| 41    |  <p>Chemical structure of 1-(10-undecyloxyphenyl)ethan-1-ol-1-yl furan-2-ylmethanol. It features a furan ring connected to a chiral carbon atom, which is also bonded to a hydroxyl group and a 10-undecyloxyphenyl group.</p> | >100                                                            | >20                                                          | >20                                                             | >20                                     |

| Entry | Structure                                                                           | Cdc25A<br>IC <sub>50</sub> /IC <sub>50</sub><br>in 0.001%<br>T* | AChE<br>IC <sub>50</sub> /IC <sub>50</sub><br>in 0.01%<br>T* | 11βHSD1<br>IC <sub>50</sub> /IC <sub>50</sub><br>in 0.01%<br>T* | 11βHS<br>D2<br>IC <sub>50</sub> ,<br>μM |
|-------|-------------------------------------------------------------------------------------|-----------------------------------------------------------------|--------------------------------------------------------------|-----------------------------------------------------------------|-----------------------------------------|
| 42    | 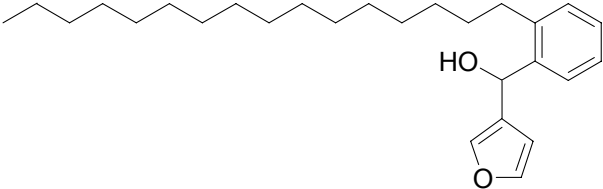   | >100                                                            | >20                                                          | >20                                                             | >20                                     |
| 43    |    | 8                                                               | >20                                                          | >20                                                             | >20                                     |
| 44    |   | 13                                                              | >20                                                          | >20                                                             | >20                                     |
| 45    |  | 23                                                              | >20                                                          | >20                                                             | >20                                     |
| 46    |  | 8.5                                                             | >20                                                          | >20                                                             | >20                                     |

| Entry | Structure                                                                           | Cdc25A<br>IC <sub>50</sub> /IC <sub>50</sub><br>in 0.001%<br>T* | AChE<br>IC <sub>50</sub> /IC <sub>50</sub><br>in 0.01%<br>T* | 11βHSD1<br>IC <sub>50</sub> /IC <sub>50</sub><br>in 0.01%<br>T* | 11βHS<br>D2<br>IC <sub>50</sub> ,<br>μM |
|-------|-------------------------------------------------------------------------------------|-----------------------------------------------------------------|--------------------------------------------------------------|-----------------------------------------------------------------|-----------------------------------------|
| 47    | 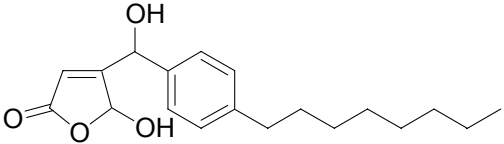   | 6.4                                                             | >20                                                          | >20                                                             | >20                                     |
| 48    |    | 5.4                                                             | >20                                                          | >20                                                             | >20                                     |
| 49    |   | 3.5                                                             | >20                                                          | >20                                                             | >20                                     |
| 50    |  | 5.7                                                             | >20                                                          | >20                                                             | >20                                     |

| Entry | Structure                                                                          | Cdc25A<br>IC <sub>50</sub> /IC <sub>50</sub><br>in 0.001%<br>T* | AChE<br>IC <sub>50</sub> /IC <sub>50</sub><br>in 0.01%<br>T* | 11βHSD1<br>IC <sub>50</sub> /IC <sub>50</sub><br>in 0.01%<br>T* | 11βHS<br>D2<br>IC <sub>50</sub> ,<br>μM |
|-------|------------------------------------------------------------------------------------|-----------------------------------------------------------------|--------------------------------------------------------------|-----------------------------------------------------------------|-----------------------------------------|
| 51    | 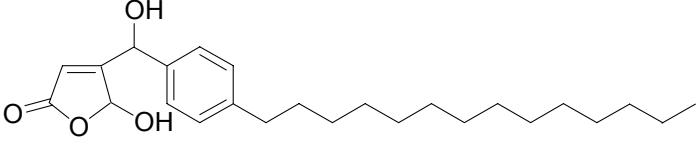  | 4.8                                                             | >20                                                          | >20                                                             | >20                                     |
| 52    |   | 4                                                               | >20                                                          | >20                                                             | >20                                     |
| 53    |   | 1.7                                                             | >20                                                          | >20                                                             | >20                                     |
| 54    |  | >100                                                            | >20                                                          | >20                                                             | >20                                     |

| Entry | Structure                                                                           | Cdc25A<br>IC <sub>50</sub> /IC <sub>50</sub><br>in 0.001%<br>T* | AChE<br>IC <sub>50</sub> /IC <sub>50</sub><br>in 0.01%<br>T* | 11βHSD1<br>IC <sub>50</sub> /IC <sub>50</sub><br>in 0.01%<br>T* | 11βHS<br>D2<br>IC <sub>50</sub> ,<br>μM |
|-------|-------------------------------------------------------------------------------------|-----------------------------------------------------------------|--------------------------------------------------------------|-----------------------------------------------------------------|-----------------------------------------|
| 55    | 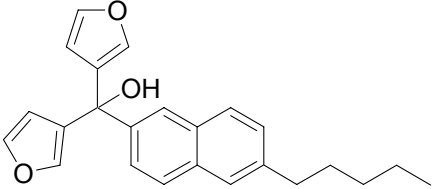   | >100                                                            | >20                                                          | >20                                                             | >20                                     |
| 56    |    | >100                                                            | >20                                                          | >20                                                             | >20                                     |
| 57    |   | >100                                                            | >20                                                          | >20                                                             | >20                                     |
| 58    |  | >100                                                            | >20                                                          | >20                                                             | >20                                     |

| Entry | Structure                                                                          | Cdc25A<br>IC <sub>50</sub> /IC <sub>50</sub><br>in 0.001%<br>T* | AChE<br>IC <sub>50</sub> /IC <sub>50</sub><br>in 0.01%<br>T* | 11βHSD1<br>IC <sub>50</sub> /IC <sub>50</sub><br>in 0.01%<br>T* | 11βHS<br>D2<br>IC <sub>50</sub> ,<br>μM |
|-------|------------------------------------------------------------------------------------|-----------------------------------------------------------------|--------------------------------------------------------------|-----------------------------------------------------------------|-----------------------------------------|
| 59    | 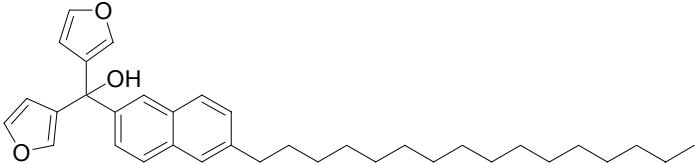  | >100                                                            | >20                                                          | >20                                                             | >20                                     |
| 60    |   | 4.8                                                             | >20                                                          | >20                                                             | >20                                     |
| 61    |  | 0.35 ± 0.18                                                     | >20                                                          | 14 ± 3                                                          | 2.4 ± 0.3                               |
|       |                                                                                    | 0.49 ± 0.18                                                     |                                                              | 19 ± 4                                                          |                                         |

| Entry | Structure                                                                          | Cdc25A<br>IC <sub>50</sub> /IC <sub>50</sub><br>in 0.001%<br>T* | AChE<br>IC <sub>50</sub> /IC <sub>50</sub><br>in 0.01%<br>T* | 11βHSD1<br>IC <sub>50</sub> /IC <sub>50</sub><br>in 0.01%<br>T* | 11βHS<br>D2<br>IC <sub>50</sub> ,<br>μM |
|-------|------------------------------------------------------------------------------------|-----------------------------------------------------------------|--------------------------------------------------------------|-----------------------------------------------------------------|-----------------------------------------|
| 62    | 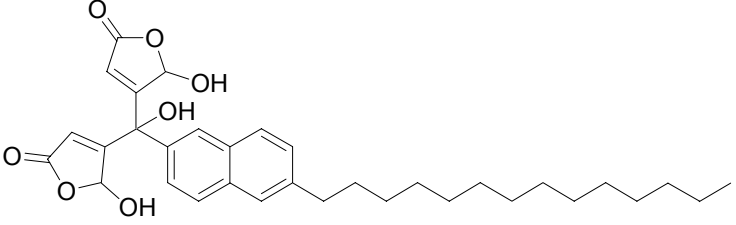  | 10                                                              | >20                                                          | >20                                                             | >20                                     |
| 63    |   | 3.9                                                             | >20                                                          | >20                                                             | >20                                     |
| 64    |  | >100                                                            | >20                                                          | >20                                                             | >20                                     |



| Entry | Structure                                                                           | Cdc25A<br>IC <sub>50</sub> /IC <sub>50</sub><br>in 0.001%<br>T* | AChE<br>IC <sub>50</sub> /IC <sub>50</sub><br>in 0.01%<br>T* | 11βHSD1<br>IC <sub>50</sub> /IC <sub>50</sub><br>in 0.01%<br>T* | 11βHS<br>D2<br>IC <sub>50</sub> ,<br>μM |
|-------|-------------------------------------------------------------------------------------|-----------------------------------------------------------------|--------------------------------------------------------------|-----------------------------------------------------------------|-----------------------------------------|
| 65    | 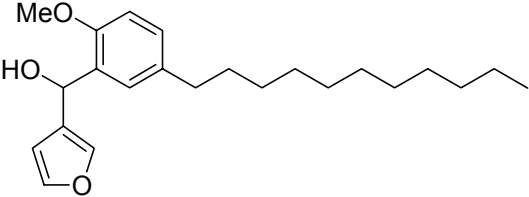   | >100                                                            | >20                                                          | >20                                                             | >20                                     |
| 66    |    | 1.8 ± 0.7                                                       | >20                                                          | 19 ± 3                                                          | 6.7 ± 0.9                               |
|       |                                                                                     | 1.1 ± 0.1                                                       |                                                              | 22 ± 4                                                          |                                         |
| 67    |   | >100                                                            | >20                                                          | >20                                                             | >20                                     |
| 68    |  | >100                                                            | >20                                                          | >20                                                             | >20                                     |

| Entry | Structure                                                                           | Cdc25A<br>IC <sub>50</sub> /IC <sub>50</sub><br>in 0.001%<br>T* | AChE<br>IC <sub>50</sub> /IC <sub>50</sub><br>in 0.01%<br>T* | 11βHSD1<br>IC <sub>50</sub> /IC <sub>50</sub><br>in 0.01%<br>T* | 11βHS<br>D2<br>IC <sub>50</sub> ,<br>μM |
|-------|-------------------------------------------------------------------------------------|-----------------------------------------------------------------|--------------------------------------------------------------|-----------------------------------------------------------------|-----------------------------------------|
| 69    | 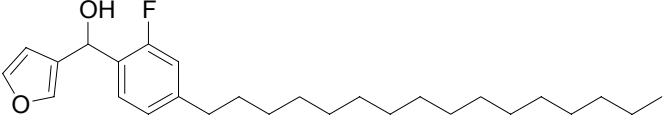   | >100                                                            | >20                                                          | >20                                                             | >20                                     |
| 70    |    | >100                                                            | >20                                                          | >20                                                             | >20                                     |
| 71    |    | >100                                                            | >20                                                          | >20                                                             | >20                                     |
| 72    |   | >100                                                            | >20                                                          | >20                                                             | >20                                     |
| 73    |  | 5.4                                                             | >20                                                          | >20                                                             | >20                                     |

| Entry | Structure                                                                           | Cdc25A<br>IC <sub>50</sub> /IC <sub>50</sub><br>in 0.001%<br>T* | AChE<br>IC <sub>50</sub> /IC <sub>50</sub><br>in 0.01%<br>T* | 11βHSD1<br>IC <sub>50</sub> /IC <sub>50</sub><br>in 0.01%<br>T* | 11βHS<br>D2<br>IC <sub>50</sub> ,<br>μM |
|-------|-------------------------------------------------------------------------------------|-----------------------------------------------------------------|--------------------------------------------------------------|-----------------------------------------------------------------|-----------------------------------------|
| 74    | 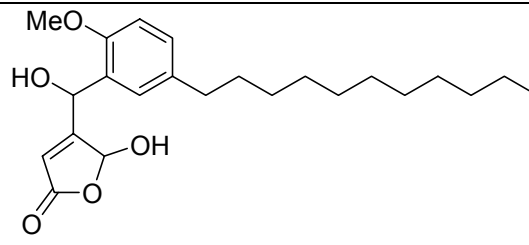   | 2.0 ± 1.0                                                       | >20                                                          | 13.2 ± 0.5                                                      | 13.9 ± 0.8                              |
| 75    |    | 2.2                                                             | >20                                                          | >20                                                             | >20                                     |
| 76    |  | 1.9 ± 0.7                                                       | >20                                                          | 11.2 ± 0.3                                                      | 13.5 ± 1.0                              |
| 77    |  | 4                                                               | >20                                                          | >20                                                             | >20                                     |

| Entry | Structure                                                                           | Cdc25A<br>IC <sub>50</sub> /IC <sub>50</sub><br>in 0.001%<br>T* | AChE<br>IC <sub>50</sub> /IC <sub>50</sub><br>in 0.01%<br>T* | 11βHSD1<br>IC <sub>50</sub> /IC <sub>50</sub><br>in 0.01%<br>T* | 11βHS<br>D2<br>IC <sub>50</sub> ,<br>μM |
|-------|-------------------------------------------------------------------------------------|-----------------------------------------------------------------|--------------------------------------------------------------|-----------------------------------------------------------------|-----------------------------------------|
| 78    | 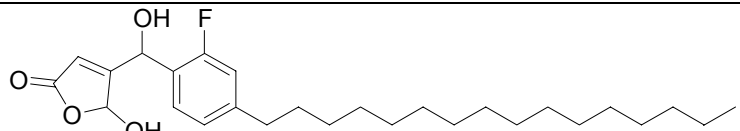   | >100                                                            | >20                                                          | 19 ± 3<br>21 ± 3                                                | 5.3 ± 1.1                               |
| 79    |    | 14                                                              | >20                                                          | >20                                                             | >20                                     |
| 80    |    | 12                                                              | >20                                                          | >20                                                             | >20                                     |
| 81    |   | 11                                                              | >20                                                          | >20                                                             | >20                                     |
| 82    |  | >100                                                            | >20                                                          | >20                                                             | >20                                     |

| Entry | Structure                                                                           | Cdc25A<br>IC <sub>50</sub> /IC <sub>50</sub><br>in 0.001%<br>T* | AChE<br>IC <sub>50</sub> /IC <sub>50</sub><br>in 0.01%<br>T* | 11βHSD1<br>IC <sub>50</sub> /IC <sub>50</sub><br>in 0.01%<br>T* | 11βHS<br>D2<br>IC <sub>50</sub> ,<br>μM |
|-------|-------------------------------------------------------------------------------------|-----------------------------------------------------------------|--------------------------------------------------------------|-----------------------------------------------------------------|-----------------------------------------|
| 83    | 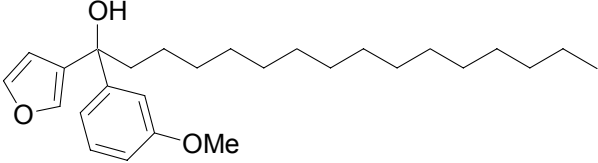   | >100                                                            | >20                                                          | >20                                                             | >20                                     |
| 84    |    | >100                                                            | >20                                                          | >20                                                             | >20                                     |
| 85    |   | >100                                                            | >20                                                          | >20                                                             | >20                                     |
| 86    |  | >100                                                            | >20                                                          | >20                                                             | >20                                     |

| Entry | Structure                                                                           | Cdc25A<br>IC <sub>50</sub> /IC <sub>50</sub><br>in 0.001%<br>T* | AChE<br>IC <sub>50</sub> /IC <sub>50</sub><br>in 0.01%<br>T* | 11βHSD1<br>IC <sub>50</sub> /IC <sub>50</sub><br>in 0.01%<br>T* | 11βHS<br>D2<br>IC <sub>50</sub> ,<br>μM |
|-------|-------------------------------------------------------------------------------------|-----------------------------------------------------------------|--------------------------------------------------------------|-----------------------------------------------------------------|-----------------------------------------|
| 87    | 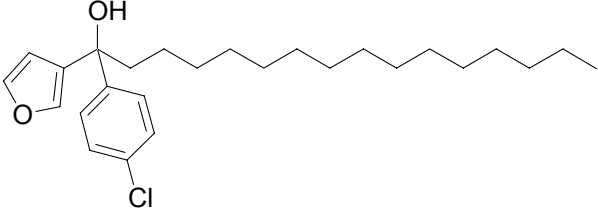   | >100                                                            | >20                                                          | >20                                                             | >20                                     |
| 88    |    | 1.6 ± 0.6                                                       | 4.5 ± 0.3                                                    | 10 ± 1                                                          | 14 ± 2                                  |
|       |                                                                                     | 1.0 ± 0.1                                                       | 4.5 ± 0.3                                                    | 10 ± 2                                                          |                                         |
| 89    |   | 4.5 ± 2.1                                                       | 21 ± 3                                                       | >20                                                             | >20                                     |
| 90    |  | 1.5 ± 0.2                                                       | 2.1 ± 0.5                                                    | 13 ± 3                                                          | 34 ± 4                                  |
|       |                                                                                     | 1.4 ± 0.01                                                      | 1.6 ± 0.1                                                    |                                                                 |                                         |

| Entry | Structure                                                                          | Cdc25A<br>IC <sub>50</sub> /IC <sub>50</sub><br>in 0.001%<br>T* | AChE<br>IC <sub>50</sub> /IC <sub>50</sub><br>in 0.01%<br>T* | 11βHSD1<br>IC <sub>50</sub> /IC <sub>50</sub><br>in 0.01%<br>T* | 11βHS<br>D2<br>IC <sub>50</sub> ,<br>μM |
|-------|------------------------------------------------------------------------------------|-----------------------------------------------------------------|--------------------------------------------------------------|-----------------------------------------------------------------|-----------------------------------------|
| 91    | 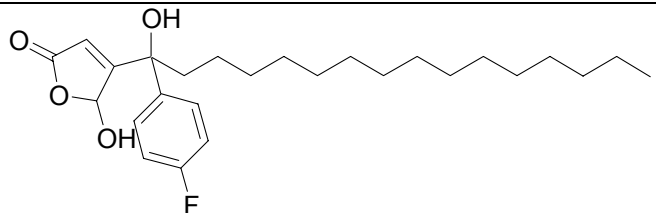  | 2.9 ± 1.1                                                       | 24 ± 6                                                       | >20                                                             | >20                                     |
| 92    |   | 1.2 ± 0.2                                                       | 16 ± 2                                                       | 93 ± 10                                                         | 23 ± 8                                  |
| 93    |  | 2.3 ± 0.5                                                       | 1.3 ± 0.1                                                    | 7.8 ± 1.8                                                       | 2.8 ± 0.4                               |
|       |                                                                                    | 1.9 ± 0.1                                                       | 1.9 ± 0.1                                                    | 5.0 ± 2.1                                                       |                                         |

| Entry | Structure | Cdc25A<br>IC <sub>50</sub> /IC <sub>50</sub><br>in 0.001%<br>T* | AChE<br>IC <sub>50</sub> /IC <sub>50</sub><br>in 0.01%<br>T* | 11βHSD1<br>IC <sub>50</sub> /IC <sub>50</sub><br>in 0.01%<br>T* | 11βHS<br>D2<br>IC <sub>50</sub> ,<br>μM |
|-------|-----------|-----------------------------------------------------------------|--------------------------------------------------------------|-----------------------------------------------------------------|-----------------------------------------|
| 94    |           | >100                                                            | >20                                                          | >20                                                             | >20                                     |
| 95    |           | >100                                                            | >20                                                          | >20                                                             | >20                                     |
| 96    |           | >100                                                            | >20                                                          | >20                                                             | >20                                     |
| 97    |           | >100                                                            | >20                                                          | >20                                                             | >20                                     |



| Entry | Structure                                                                          | Cdc25A<br>IC <sub>50</sub> /IC <sub>50</sub><br>in 0.001%<br>T* | AChE<br>IC <sub>50</sub> /IC <sub>50</sub><br>in 0.01%<br>T* | 11βHSD1<br>IC <sub>50</sub> /IC <sub>50</sub><br>in 0.01%<br>T* | 11βHS<br>D2<br>IC <sub>50</sub> ,<br>μM |
|-------|------------------------------------------------------------------------------------|-----------------------------------------------------------------|--------------------------------------------------------------|-----------------------------------------------------------------|-----------------------------------------|
| 98    | 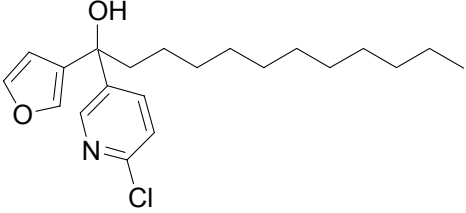  | >100                                                            | >20                                                          | >20                                                             | >20                                     |
| 99    |   | >100                                                            | >20                                                          | >20                                                             | >20                                     |
| 100   |  | 30                                                              | >20                                                          | >20                                                             | >20                                     |

| Entry | Structure                                                                           | Cdc25A<br>IC <sub>50</sub> /IC <sub>50</sub><br>in 0.001%<br>T* | AChE<br>IC <sub>50</sub> /IC <sub>50</sub><br>in 0.01%<br>T* | 11βHSD1<br>IC <sub>50</sub> /IC <sub>50</sub><br>in 0.01%<br>T* | 11βHS<br>D2<br>IC <sub>50</sub> ,<br>μM |
|-------|-------------------------------------------------------------------------------------|-----------------------------------------------------------------|--------------------------------------------------------------|-----------------------------------------------------------------|-----------------------------------------|
| 101   | 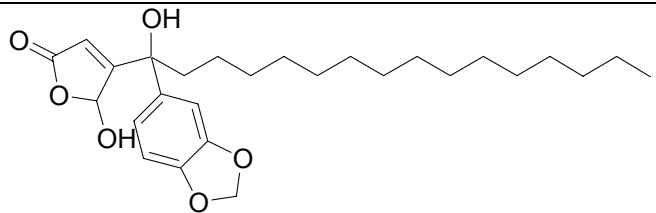   | 19                                                              | >20                                                          | >20                                                             | >20                                     |
| 102   |    | 35                                                              | >20                                                          | >20                                                             | >20                                     |
| 103   |   | 12                                                              | >20                                                          | >20                                                             | >20                                     |
| 104   |  | 2.8 ± 0.3                                                       | 15 ± 1                                                       | >20                                                             | >20                                     |

| Entry | Structure                                                                           | Cdc25A<br>IC <sub>50</sub> /IC <sub>50</sub><br>in 0.001%<br>T* | AChE<br>IC <sub>50</sub> /IC <sub>50</sub><br>in 0.01%<br>T* | 11βHSD1<br>IC <sub>50</sub> /IC <sub>50</sub><br>in 0.01%<br>T* | 11βHS<br>D2<br>IC <sub>50</sub> ,<br>μM |
|-------|-------------------------------------------------------------------------------------|-----------------------------------------------------------------|--------------------------------------------------------------|-----------------------------------------------------------------|-----------------------------------------|
| 105   | 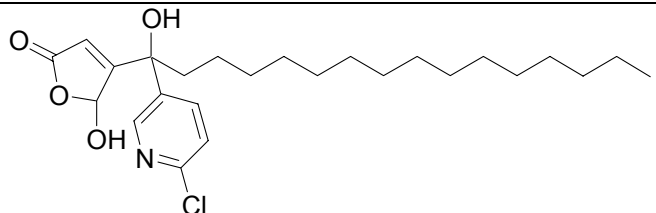   | 5.1 ± 2.1                                                       | 23 ± 5                                                       | >20                                                             | >20                                     |
| 106   |    | 7.9 ± 0.8                                                       | >20                                                          | 5.8 ± 0.7                                                       | 52 ± 9                                  |
| 107   |   | 3.1 ± 0.3                                                       | >20                                                          | 3.8 ± 0.4                                                       | 39 ± 6                                  |
| 108   |  | 10.7                                                            | >20                                                          | >20                                                             | >20                                     |

| Entry | Structure                                                                           | Cdc25A<br>IC <sub>50</sub> /IC <sub>50</sub><br>in 0.001%<br>T* | AChE<br>IC <sub>50</sub> /IC <sub>50</sub><br>in 0.01%<br>T* | 11βHSD1<br>IC <sub>50</sub> /IC <sub>50</sub><br>in 0.01%<br>T* | 11βHS<br>D2<br>IC <sub>50</sub> ,<br>μM |
|-------|-------------------------------------------------------------------------------------|-----------------------------------------------------------------|--------------------------------------------------------------|-----------------------------------------------------------------|-----------------------------------------|
| 109   | 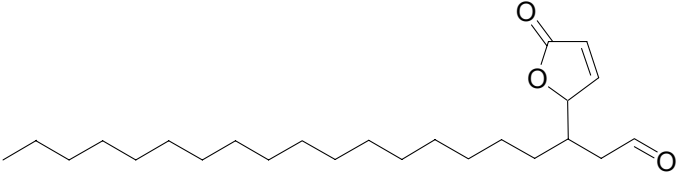   | >100                                                            | >20                                                          | 90                                                              | 117                                     |
| 110   |    | >100                                                            | >20                                                          | 88                                                              | 85                                      |
| 111   |   | 43                                                              | >20                                                          | 38                                                              | 83                                      |
| 112   |  | 45                                                              | >20                                                          | 10 ± 2<br>12 ± 2                                                | 95 ± 4                                  |

| Entry | Structure                                                                           | Cdc25A<br>IC <sub>50</sub> /IC <sub>50</sub><br>in 0.001%<br>T* | AChE<br>IC <sub>50</sub> /IC <sub>50</sub><br>in 0.01%<br>T* | 11βHSD1<br>IC <sub>50</sub> /IC <sub>50</sub><br>in 0.01%<br>T* | 11βHS<br>D2<br>IC <sub>50</sub> ,<br>μM |
|-------|-------------------------------------------------------------------------------------|-----------------------------------------------------------------|--------------------------------------------------------------|-----------------------------------------------------------------|-----------------------------------------|
| 113   | 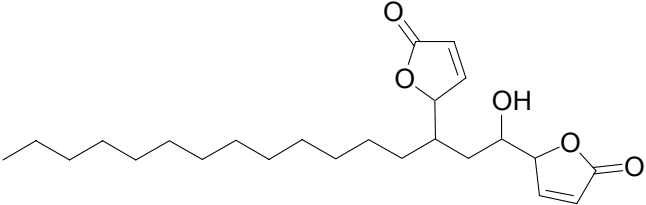   | 30                                                              | >20                                                          | >20                                                             | >20                                     |
| 114   |    | >100                                                            | >20                                                          | >20                                                             | >20                                     |
| 115   |    | >100                                                            | >20                                                          | >20                                                             | >20                                     |
| 116   |   | >100                                                            | >20                                                          | >20                                                             | >20                                     |
| 117   |  | >100                                                            | >20                                                          | >20                                                             | >20                                     |

| Entry | Structure                                                                           | Cdc25A<br>IC <sub>50</sub> /IC <sub>50</sub><br>in 0.001%<br>T* | AChE<br>IC <sub>50</sub> /IC <sub>50</sub><br>in 0.01%<br>T* | 11βHSD1<br>IC <sub>50</sub> /IC <sub>50</sub><br>in 0.01%<br>T* | 11βHS<br>D2<br>IC <sub>50</sub> ,<br>μM |
|-------|-------------------------------------------------------------------------------------|-----------------------------------------------------------------|--------------------------------------------------------------|-----------------------------------------------------------------|-----------------------------------------|
| 118   | 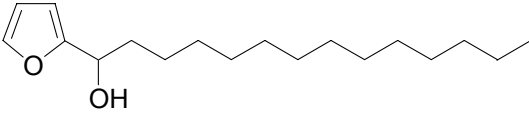   | >100                                                            | >20                                                          | >20                                                             | >20                                     |
| 119   |    | >100                                                            | >20                                                          | >20                                                             | >20                                     |
| 120   |    | >100                                                            | >20                                                          | >20                                                             | >20                                     |
| 121   |    | >100                                                            | >20                                                          | >20                                                             | >20                                     |
| 122   |  | 20                                                              | >20                                                          | >20                                                             | >20                                     |
| 123   |  | 12                                                              | >20                                                          | >20                                                             | >20                                     |

| Entry | Structure                                                                           | Cdc25A<br>IC <sub>50</sub> /IC <sub>50</sub><br>in 0.001%<br>T* | AChE<br>IC <sub>50</sub> /IC <sub>50</sub><br>in 0.01%<br>T* | 11βHSD1<br>IC <sub>50</sub> /IC <sub>50</sub><br>in 0.01%<br>T* | 11βHS<br>D2<br>IC <sub>50</sub> ,<br>μM |
|-------|-------------------------------------------------------------------------------------|-----------------------------------------------------------------|--------------------------------------------------------------|-----------------------------------------------------------------|-----------------------------------------|
| 124   | 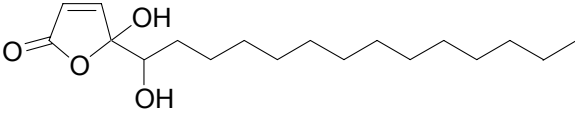   | 13                                                              | >20                                                          | >20                                                             | >20                                     |
| 125   |    | 14                                                              | >20                                                          | >20                                                             | >20                                     |
| 126   |    | 3.7                                                             | >20                                                          | >20                                                             | >20                                     |
| 127   |   | >100                                                            | >20                                                          | >20                                                             | >20                                     |
| 128   |  | >100                                                            | >20                                                          | >20                                                             | >20                                     |

| Entry | Structure                                                                           | Cdc25A<br>IC <sub>50</sub> /IC <sub>50</sub><br>in 0.001%<br>T* | AChE<br>IC <sub>50</sub> /IC <sub>50</sub><br>in 0.01%<br>T* | 11βHSD1<br>IC <sub>50</sub> /IC <sub>50</sub><br>in 0.01%<br>T* | 11βHS<br>D2<br>IC <sub>50</sub> ,<br>μM |
|-------|-------------------------------------------------------------------------------------|-----------------------------------------------------------------|--------------------------------------------------------------|-----------------------------------------------------------------|-----------------------------------------|
| 129   | 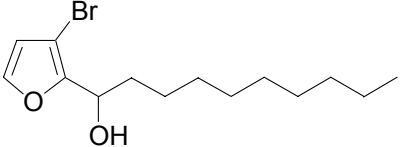   | >100                                                            | >20                                                          | >20                                                             | >20                                     |
| 130   |    | >100                                                            | >20                                                          | >20                                                             | >20                                     |
| 131   |    | >100                                                            | >20                                                          | >20                                                             | >20                                     |
| 132   |   | >100                                                            | >20                                                          | >20                                                             | >20                                     |
| 133   |  | >100                                                            | >20                                                          | >20                                                             | >20                                     |



| Entry | Structure                                                                           | Cdc25A<br>IC <sub>50</sub> /IC <sub>50</sub><br>in 0.001%<br>T* | AChE<br>IC <sub>50</sub> /IC <sub>50</sub><br>in 0.01%<br>T* | 11βHSD1<br>IC <sub>50</sub> /IC <sub>50</sub><br>in 0.01%<br>T* | 11βHS<br>D2<br>IC <sub>50</sub> ,<br>μM |
|-------|-------------------------------------------------------------------------------------|-----------------------------------------------------------------|--------------------------------------------------------------|-----------------------------------------------------------------|-----------------------------------------|
| 134   | 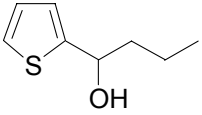   | >100                                                            | >20                                                          | >20                                                             | >20                                     |
| 135   |    | >100                                                            | >20                                                          | >20                                                             | >20                                     |
| 136   |    | >100                                                            | >20                                                          | >20                                                             | >20                                     |
| 137   |    | >100                                                            | >20                                                          | >20                                                             | >20                                     |
| 138   |  | >100                                                            | >20                                                          | >20                                                             | >20                                     |
| 139   |  | 90                                                              | >20                                                          | >20                                                             | >20                                     |

| Entry | Structure                                                                           | Cdc25A<br>IC <sub>50</sub> /IC <sub>50</sub><br>in 0.001%<br>T* | AChE<br>IC <sub>50</sub> /IC <sub>50</sub><br>in 0.01%<br>T* | 11βHSD1<br>IC <sub>50</sub> /IC <sub>50</sub><br>in 0.01%<br>T* | 11βHS<br>D2<br>IC <sub>50</sub> ,<br>μM |
|-------|-------------------------------------------------------------------------------------|-----------------------------------------------------------------|--------------------------------------------------------------|-----------------------------------------------------------------|-----------------------------------------|
| 140   | 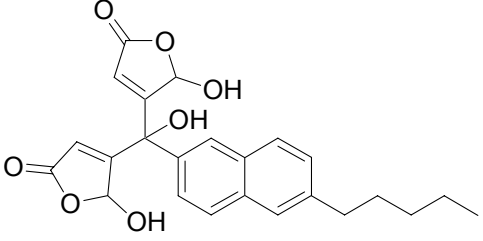   | >100                                                            | >20                                                          | >20                                                             | >20                                     |
| 141   |    | >20                                                             | >20                                                          | >20                                                             | >20                                     |
| 142   |   | 40                                                              | >20                                                          | >20                                                             | >20                                     |
| 143   |  | 100                                                             | >20                                                          | >20                                                             | >20                                     |

| Entry | Structure                                                                           | Cdc25A<br>IC <sub>50</sub> /IC <sub>50</sub><br>in 0.001%<br>T* | AChE<br>IC <sub>50</sub> /IC <sub>50</sub><br>in 0.01%<br>T* | 11βHSD1<br>IC <sub>50</sub> /IC <sub>50</sub><br>in 0.01%<br>T* | 11βHS<br>D2<br>IC <sub>50</sub> ,<br>μM |
|-------|-------------------------------------------------------------------------------------|-----------------------------------------------------------------|--------------------------------------------------------------|-----------------------------------------------------------------|-----------------------------------------|
| 144   | 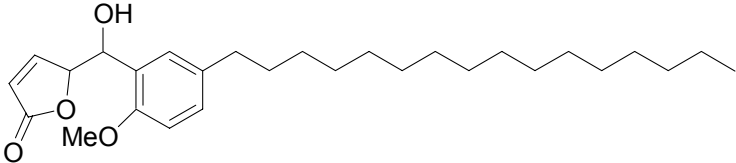   | >100                                                            | >20                                                          | >20                                                             | >20                                     |
| 145   |    | >100                                                            | >20                                                          | >20                                                             | >20                                     |
| 146   |   | 50                                                              | >20                                                          | >20                                                             | >20                                     |
| 147   |  | >100                                                            | >20                                                          | >20                                                             | >20                                     |

\*Control experiments with 0.001% or 0.01% Triton X-100, respectively, according to McGovern *et al.* [McGovern, S. L., Helfand, B. T., Feng, B. & Shoichet, B. K. (2003) *J. Med. Chem.* **46**, 4265-4272]. All IC<sub>50</sub> values are in μM.
