# Supplementary material
Source: PubMed Central journal article supplement (PMC534721)

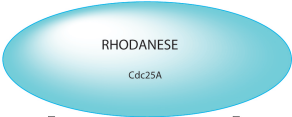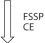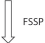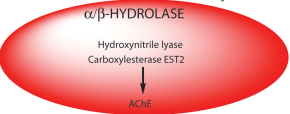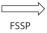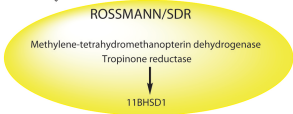

Supplement: pnas_101_48_16721__2.pdf [file pnas_101_48_16721__2.pdf]
